# Supplementary material for: Starvation Alters Gut Microbiome in Black Soldier Fly (Diptera: Stratiomyidae) Larvae
Source: Front Microbiol. 2021 Feb 16;12:601253. doi: 10.3389/fmicb.2021.601253 (PMC7921171; doi:10.3389/fmicb.2021.601253)
Supplement: Supplementary Table 1 — Relative abundance of taxa across samples. [file Table_1.XLSX]

## Sheet: Treatment Replicates
Supplemental Table 1. Relative abundance of taxa across samples. A0-D0=Fed larval replicates at Time 0. A24-D24=laval replicates at 24 H. AS24-DS24=Starved larval replicaes at 24 H. A48-D48=Fed larval replicates at 48H. AS48-DS48=Starved larval replicates at 48 H.
PHYLUM
SampleID	Mean	A0	B0	C0	D0	A24	B24	C24	D24	AS24	BS24	CS24	DS24	A48	B48	C48	D48	AS48	BS48	CS48	DS48
Proteobacteria	0.265479	0.260195	0.37864	0.362129	0.362129	0.235987	0.321235	0.248749	0.232353	0.272996	0.279722	0.257396	0.273538	0.23381	0.275171	0.256577	0.240118	0.193478	0.205401	0.210386	0.209574
Firmicutes	0.139934	0.102632	0.134372	0.136384	0.166945	0.167909	0.194112	0.195428	0.222672	0.0869945	0.116754	0.112734	0.120606	0.190809	0.241134	0.187221	0.199644	0.0611308	0.0549098	0.0457008	0.0605835
Actinobacteria	0.311269	0.129789	0.103555	0.217257	0.211889	0.162809	0.160684	0.200671	0.203003	0.352179	0.358885	0.437819	0.416414	0.317218	0.322727	0.349427	0.380988	0.481272	0.498263	0.569691	0.350848
Tenericutes	0.00574336	0.0117832	0.00976934	0.00488164	0.00422878	0.00858435	0.00546238	0.0087168	0.00886646	0.00584595	0.00355368	0.00413247	0.00330974	0.00420066	0.00332224	0.00367767	0.00281153	0.00539677	0.00427117	0.00432714	0.00772527
Bacteroidetes	0.0826275	0.0595275	0.0505588	0.0922198	0.0958493	0.0725495	0.0823374	0.0377877	0.0381226	0.0872265	0.0985921	0.0744624	0.0789039	0.0913141	0.0487619	0.063462	0.066811	0.113323	0.140017	0.0990242	0.161699
BRC1	0.00147654	0.00122105	0.000439072	0.000569524	0.000454708	0.00110693	0.000708338	0.00143393	0.00134437	0.00107594	0.00211422	0.00386212	0.00224208	0.000695651	0.00685882	0.00259188	0.000485944	0.000691111	0.000755446	0.000193032	0.000686691
Verrucomicrobia	0.0135754	0.00382597	0.00241489	0.00344427	0.0117315	0.0058961	0.00463144	0.00362256	0.00672187	0.0141307	0.0089067	0.0108139	0.0216735	0.00171237	0.000857352	0.00301219	0.00662967	0.033214	0.0308571	0.0204721	0.0769406
Acidobacteria	0.00118128	0.00199439	0.00160993	0.000705125	0.0010913	0.00189759	0.00136219	0.0022641	0.0021766	0.0012194	0.00130452	0.000926909	0.000533829	0.000963209	0.00128603	0.000490356	0.000902468	0.000772419	0.000552057	0.000418237	0.00115489
Crenarchaeota	0.0732225	0.17255	0.188502	0.0668787	0.0607497	0.139606	0.0970981	0.115116	0.109598	0.0681424	0.0469927	0.0377457	0.0290403	0.0647849	0.0402956	0.0509506	0.0406342	0.0435669	0.0219467	0.0193531	0.0508981
Euryarchaeota	0.104985	0.256883	0.244124	0.0933839	0.0798649	0.197448	0.123977	0.179418	0.168452	0.10561	0.0784509	0.0556403	0.0496817	0.0884191	0.0523699	0.0770326	0.0529448	0.0613057	0.0366198	0.0246259	0.0734447
Planctomycetes	0.0012819	0.000325614	0.000951322	0.00119329	0.00132775	0.00135542	0.0032965	0.00218863	0.00198455	0.0006097	0.000629766	0.000617939	0	0.00123077	0.00300073	0.00119087	0.00274211	0.00044719	0.000755446	0.0010724	0.000717904
CLASS
SampleID	Mean	A0	B0	C0	D0	A24	B24	C24	D24	AS24	BS24	CS24	DS24	A48	B48	C48	D48	AS48	BS48	CS48	DS48
Actinobacteria;	0.309089	0.128869	0.102651	0.216299	0.210308	0.161011	0.159048	0.199699	0.200881	0.349939	0.356498	0.434944	0.414672	0.31476	0.319219	0.347001	0.377602	0.477829	0.495296	0.566409	0.348848
Gammaproteobacteria	0.127367	0.157131	0.179841	0.257076	0.2105	0.101665	0.134109	0.12976	0.121066	0.126536	0.127646	0.111091	0.119836	0.107109	0.145654	0.132211	0.111599	0.0584569	0.0652506	0.0949104	0.0558958
Methanobacteria	0.0918935	0.226538	0.211827	0.0817679	0.0684955	0.169472	0.107309	0.158396	0.148688	0.0924	0.0687322	0.0491737	0.0455451	0.0764342	0.0476887	0.0693789	0.0460992	0.0534999	0.0317829	0.0212075	0.0634334
Bacilli	0.0833718	0.0645501	0.0919379	0.102244	0.108533	0.0884459	0.0986888	0.120656	0.124011	0.0503285	0.0616313	0.0583816	0.0787495	0.102292	0.164403	0.0939902	0.111921	0.0424614	0.0343482	0.0301121	0.0397512
Clostridia	0.054365	0.0344699	0.0386924	0.0322462	0.0561597	0.0759927	0.092843	0.0719774	0.0959599	0.0347709	0.0534068	0.053163	0.0408668	0.0867181	0.0736657	0.0909223	0.085093	0.0173161	0.0194619	0.014502	0.0190716
Epsilonproteobacteria	0.0444103	0.0370464	0.0285023	0.0256387	0.0527119	0.0810581	0.112748	0.0452053	0.0368066	0.031274	0.0359927	0.0360013	0.0194226	0.0345556	0.0588161	0.0431823	0.0494839	0.0415076	0.0319187	0.0358756	0.050458
Thermoprotei;	0.0410807	0.0896214	0.111282	0.0378309	0.036349	0.0844082	0.0599799	0.0629049	0.0588342	0.0362564	0.0232258	0.0210303	0.0138987	0.037588	0.0201925	0.0267975	0.0239702	0.0264755	0.0116314	0.011478	0.0278595
Betaproteobacteria	0.0406564	0.0365291	0.0262971	0.0515007	0.053351	0.0343806	0.0451758	0.0356182	0.0372296	0.0511811	0.0468273	0.0420913	0.0470595	0.0531562	0.0420105	0.0439961	0.0439025	0.0315829	0.0355898	0.0274841	0.0281637
Alphaproteobacteria	0.0400786	0.0207867	0.0173122	0.0328031	0.0328691	0.0133349	0.0198779	0.0329721	0.0313718	0.0528457	0.0569843	0.0566838	0.0727902	0.0310289	0.0232142	0.0319067	0.0295159	0.0585419	0.0688377	0.0469237	0.0709716
Sphingobacteriia	0.0314809	0.0201715	0.0124134	0.0300786	0.0275131	0.0145993	0.0156447	0.0105345	0.0102864	0.0391046	0.0318081	0.0370347	0.0383996	0.0240192	0.0120296	0.0191044	0.0176128	0.0617741	0.073569	0.0504252	0.083496
Flavobacteriia	0.0314078	0.0288119	0.0302431	0.0522893	0.0549347	0.0260948	0.031315	0.0105976	0.0164368	0.0325962	0.0395816	0.022306	0.0282786	0.0395735	0.0170419	0.0181316	0.0296316	0.0299369	0.0439393	0.0282246	0.0481905
Unclassified	0.0235725	0.0605237	0.0541762	0.0207158	0.0175986	0.0392647	0.0272457	0.0409787	0.0371291	0.0242308	0.0178544	0.0132212	0.0111546	0.0194545	0.0162542	0.0170934	0.0125641	0.0122142	0.00788031	0.00583195	0.0160639
Bacteroidia	0.0174511	0.0100118	0.00723008	0.00872316	0.0120824	0.0313606	0.0345696	0.0160312	0.011143	0.0128776	0.0251267	0.0112883	0.00809334	0.0261522	0.0185098	0.0246671	0.0185519	0.017094	0.0170991	0.0157881	0.0226229
Opitutae	0.0134809	0.00378854	0.00239159	0.00336516	0.0116615	0.00580956	0.00458028	0.00362913	0.00666531	0.0140718	0.00886722	0.0106698	0.0213827	0.00165987	0.00085926	0.00294632	0.00653102	0.0330231	0.0308233	0.020403	0.0764886
Halobacteria	0.00858154	0.0213869	0.0204018	0.00727309	0.00756816	0.0179938	0.0104692	0.0142141	0.0141638	0.00897436	0.00643661	0.00394317	0.00310049	0.00685365	0.00236295	0.00533144	0.00448139	0.00496161	0.00322772	0.0021776	0.00630898
Deltaproteobacteria	0.00749982	0.00414159	0.00788657	0.0113122	0.0120557	0.00544788	0.00893973	0.0054941	0.00550102	0.0112718	0.012048	0.0114687	0.0139522	0.00780852	0.00565676	0.00536651	0.00526881	0.00329893	0.0037996	0.00518119	0.00409667
Mollicutes	0.00564972	0.0117526	0.0096762	0.00483063	0.00417522	0.0085222	0.00541182	0.00873259	0.00881231	0.0056359	0.00351088	0.00398183	0.00331431	0.00417644	0.00332961	0.00361275	0.00277916	0.00517512	0.00415824	0.00411385	0.00729281
AAG	0.00451968	0.010646	0.0112258	0.00425168	0.00403879	0.00884618	0.00639787	0.00584693	0.00773346	0.00397265	0.0027907	0.00185561	0.00185316	0.00437277	0.00257777	0.00275925	0.00236228	0.00275193	0.00127946	0.00143743	0.00339394
MHVG	0.00340257	0.00928806	0.00945246	0.00347371	0.00263187	0.00566641	0.00294446	0.00514127	0.00448627	0.00330256	0.00264066	0.00164943	0.00163934	0.00260581	0.0015753	0.00308662	0.00176013	0.00180299	0.00102744	0.00083672	0.00303997
Methanomicrobia	0.00300662	0.00632781	0.00763846	0.00302141	0.00238324	0.00660828	0.0041895	0.00471283	0.00373856	0.00293162	0.00216054	0.0014948	0.00078403	0.00355176	0.00136049	0.00166023	0.00140116	0.00172843	0.00091113	0.00090465	0.00262354
Erysipelotrichi	0.00184713	0.00351502	0.00339797	0.00165157	0.00185219	0.00267388	0.00199414	0.00280825	0.00218515	0.00183248	0.00144465	0.00102353	0.00094695	0.00134115	0.00235272	0.00149654	0.00169065	0.00121038	0.0010219	0.00093888	0.0015646
Cytophagia	0.00169478	0.00033948	0.00049215	0.00104483	0.00107034	0.00037676	0.00060434	0.00049144	0.00017091	0.00193846	0.00155289	0.00295094	0.00352814	0.00114227	0.00085926	0.00125102	0.00072374	0.00316878	0.00373659	0.00328429	0.00516899
Acidimicrobiia	0.00164948	0.00052958	0.00063451	0.0007056	0.00080048	0.00110766	0.00125413	0.00098289	0.0012177	0.00226154	0.00220555	0.0027061	0.00138987	0.00147246	0.00236295	0.00070151	0.00215385	0.00305017	0.0028497	0.00288559	0.00171779
Thermoplasmata	0.00149559	0.00272938	0.00409988	0.00132978	0.00136445	0.00334558	0.00201751	0.0022682	0.00192269	0.00132821	0.00108027	0.00077317	0.00032074	0.00155278	0.00107407	0.00070151	0.0009727	0.00095572	0.00063973	0.00031109	0.00112437
NPL_UPA2	0.00144936	0.00118137	0.00043927	0.00048849	0.00045482	0.00110766	0.00070885	0.00143653	0.0012177	0.00107692	0.00207052	0.00371122	0.00224518	0.00069607	0.00687404	0.00259557	0.00048635	0.0006507	0.00069789	0.00016091	0.00068712
ORDER
SampleID	Mean	A0	B0	C0	D0	A24	B24	C24	D24	AS24	BS24	CS24	DS24	A48	B48	C48	D48	AS48	BS48	CS48	DS48
Acidimicrobiales	0.00165022	0.000529837	0.000634543	0.00070586	0.000800727	0.00110779	0.00125401	0.000982679	0.00121818	0.00226156	0.00220709	0.00271151	0.00139328	0.00147293	0.00236273	0.000702102	0.0021539	0.00305132	0.00284963	0.00288609	0.00171873
Actinomycetales	0.282855	0.11788	0.0950325	0.1959	0.188368	0.148532	0.147146	0.181579	0.18371	0.321713	0.328517	0.397214	0.37816	0.284639	0.288947	0.316778	0.342559	0.440903	0.456078	0.527965	0.315478
Alteromonadales	0.00245048	0.00191569	0.00330541	0.00774234	0.00286051	0.00171333	0.00262406	0.00221205	0.00176286	0.00278439	0.00278067	0.00348622	0.00253784	0.00147286	0.00184433	0.00190682	0.00165684	0.0013563	0.00179572	0.0017652	0.00148609
Bacillales	0.0208896	0.0297585	0.0193726	0.0272903	0.0192084	0.0424875	0.0256698	0.0230905	0.025248	0.0195939	0.0171227	0.0102745	0.0103778	0.0307464	0.0181935	0.0194609	0.0142121	0.0228657	0.00936234	0.0106932	0.0227624
Bacteroidales	0.0174573	0.0100167	0.00723052	0.0087264	0.0120862	0.0313644	0.0345664	0.0160278	0.0111475	0.0128777	0.0251442	0.0113108	0.00811316	0.0261605	0.0185081	0.0246881	0.0185524	0.0171004	0.0170987	0.0157908	0.0226353
Bdellovibrionales	0.00526942	0.00293448	0.00595494	0.00909474	0.00924476	0.00359468	0.00624277	0.00332599	0.0025646	0.00911805	0.00905358	0.00859935	0.0102888	0.00602561	0.00300711	0.00379135	0.00302241	0.00158669	0.00215176	0.00341181	0.00237497
Burkholderiales	0.0376253	0.03396	0.0238663	0.0479635	0.0493902	0.0316978	0.0412274	0.0336126	0.0345087	0.0480216	0.0433554	0.0382321	0.0435844	0.0494594	0.0384839	0.039657	0.0402642	0.0297095	0.0332167	0.0258264	0.0264686
Campylobacterales	0.0443221	0.0369556	0.028439	0.025612	0.0525949	0.0809173	0.112519	0.0450445	0.0367784	0.0312743	0.0358976	0.0359183	0.0193987	0.0344236	0.0588106	0.0430786	0.0493694	0.0414554	0.0317628	0.0358102	0.0503813
Caulobacterales	0.00308974	0.00207859	0.00184262	0.00233477	0.00352745	0.00132257	0.00199005	0.00389292	0.00205168	0.00328465	0.00388868	0.00387358	0.00537662	0.00424917	0.00422428	0.0034403	0.00342193	0.00227154	0.00274301	0.00213149	0.00384891
Cerasicoccales	0.00202505	0.00048908	0.000292866	0.000651563	0.00163785	0.00081389	0.000436176	0.000453544	0.00166699	0.00229746	0.00117111	0.000929659	0.00364395	0.000214244	0	0.000702102	0.00111169	0.00471937	0.00465246	0.00330452	0.0113124
Clostridiales	0.0536188	0.034242	0.0382799	0.0317288	0.0555887	0.0749476	0.0919129	0.0710802	0.095203	0.0342029	0.0525656	0.0522492	0.040431	0.085942	0.0726923	0.0903326	0.0842048	0.016294	0.0185212	0.0135177	0.0184393
Cytophagales	0.00169277	0.000339639	0.000492178	0.00104522	0.00107067	0.000376801	0.000604286	0.00049134	0.000170973	0.00193848	0.00155397	0.00295683	0.00353678	0.00114263	0.000859175	0.00125208	0.000723758	0.00316998	0.0037365	0.00328485	0.00510931
Desulfobacterales	0.00103014	0.000557008	0.000805382	0.000995444	0.00107977	0.000783746	0.00120857	0.00103307	0.00149602	0.001053	0.00133627	0.00180767	0.00125038	0.000589171	0.00171835	0.000772312	0.00120433	0.000834027	0.000668791	0.00082613	0.000583326
Desulfurococcales	0.0110151	0.0259213	0.0290914	0.0100992	0.00924476	0.0226985	0.0154843	0.0142111	0.0187216	0.0102668	0.00567538	0.00495818	0.00407265	0.00894469	0.0034367	0.00786354	0.00639223	0.00728248	0.00389643	0.0028539	0.00918739
E2	0.00127021	0.00232313	0.00339237	0.00111309	0.00116469	0.00275818	0.00182649	0.00204095	0.00160287	0.00111283	0.000945896	0.000697244	0.00021435	0.00131224	0.00107397	0.000491471	0.000764289	0.000773001	0.000581557	0.000246766	0.000968738
Enterobacteriales	0.0639632	0.0796019	0.0996475	0.134772	0.106665	0.0419445	0.0590903	0.0626641	0.05211	0.0566773	0.0527292	0.0524139	0.0695774	0.0547673	0.0768211	0.0675972	0.0596494	0.0333523	0.0413099	0.0637699	0.0141044
Erysipelotrichales	0.0023107	0.00367198	0.00377472	0.0019702	0.00226396	0.00353493	0.00267158	0.00312442	0.0029386	0.00197609	0.0017749	0.00130042	0.00113299	0.00188356	0.00360035	0.00258106	0.00269486	0.00135614	0.00111881	0.0010826	0.00176188
Fervidicoccales	0.00835555	0.0181775	0.0238198	0.00863321	0.00676979	0.0161422	0.0115587	0.0123969	0.0100019	0.00890266	0.00594563	0.00387358	0.0034296	0.00835552	0.00601422	0.00449345	0.00618379	0.00394637	0.00180283	0.0020385	0.00462494
Flavobacteriales	0.0314211	0.0288259	0.030245	0.0523087	0.0549518	0.026098	0.031312	0.0105953	0.0164434	0.0325965	0.0396092	0.0223506	0.0283479	0.039586	0.0170403	0.018147	0.0296324	0.0299482	0.0439383	0.0282294	0.0482167
Frankiales	0.00123693	0.000475495	0.000227785	0.00109499	0.000829845	0.000617953	0.000654264	0.000478741	0.000816398	0.00155557	0.00142935	0.00142031	0.000764516	0.00176216	0.00243433	0.00147909	0.00208674	0.00194199	0.00178344	0.00175025	0.0011354
HA64	0.0016203	0.00048908	0.000439299	0.000325782	0.00116469	0.000768674	0.000763308	0.000453544	0.00076938	0.00193848	0.00144137	0.0010846	0.00278655	0.000214244	0	0	0.000764289	0.00349885	0.00372197	0.00253203	0.00924989
Halobacteriales	0.00858418	0.0213973	0.020403	0.00727579	0.00757051	0.017996	0.0104682	0.0142111	0.0141694	0.00897446	0.0064411	0.00395105	0.00310808	0.00685581	0.00236273	0.00533597	0.00448151	0.00496348	0.00322764	0.00217798	0.00631242
Lactobacillales	0.0624248	0.0347643	0.0724923	0.0749071	0.0892237	0.0459013	0.0728559	0.0974648	0.098685	0.030647	0.0444619	0.0482235	0.0684573	0.0715753	0.145979	0.0745393	0.0975946	0.0195216	0.0249421	0.0193415	0.0169189
Methanobacteriales	0.0919239	0.226648	0.21184	0.0817983	0.0685168	0.169493	0.107299	0.158363	0.148747	0.092401	0.0687802	0.0492719	0.0456566	0.0764583	0.0476842	0.0694379	0.0461005	0.0535201	0.0317821	0.0212111	0.063468
Methanomicrobiales	0.00209807	0.00413001	0.00532854	0.00224427	0.00157112	0.00474016	0.00308049	0.00360316	0.002415	0.00198635	0.00165156	0.0010846	0.0004287	0.00248166	0.00107397	0.00105315	0.000787449	0.00109169	0.000649405	0.000633008	0.00192706
Micrococcales	0.0204864	0.00859287	0.00581746	0.0155443	0.0177276	0.00920147	0.00879349	0.0144	0.012278	0.0213161	0.0207947	0.0311797	0.0307378	0.0222769	0.0216369	0.0238761	0.026258	0.029172	0.0312577	0.0310278	0.0278382
Orbales	0.00696923	0.00604829	0.00676516	0.00886119	0.00809455	0.00976658	0.0136304	0.0103711	0.00702702	0.00456622	0.00527901	0.00384259	0.00338673	0.00702716	0.00996643	0.00935202	0.00914361	0.00374294	0.00464082	0.00451041	0.00336247
Pasteurellales	0.00206057	0.00171993	0.00192153	0.00271666	0.00257204	0.00288329	0.00373295	0.00287749	0.00170118	0.00135215	0.00164256	0.00129636	0.00116464	0.00215851	0.00316463	0.00257437	0.00269586	0.0012151	0.00141512	0.0015278	0.000879156
Propionibacteriales	0.00294073	0.00145366	0.00102503	0.00281439	0.00261146	0.00154488	0.0013267	0.00188977	0.0028638	0.00294362	0.00358089	0.00358952	0.00435845	0.00453483	0.00415268	0.00351051	0.00453941	0.00305132	0.00312102	0.00321511	0.00268747
Pseudomonadales	0.017065	0.0291847	0.0348211	0.0516836	0.0383756	0.0168408	0.0186223	0.0171831	0.0239091	0.0137634	0.0159918	0.0127152	0.0115543	0.00930223	0.00708103	0.0100008	0.00988907	0.00404139	0.00332734	0.00728532	0.00572805
Puniceicoccales	0.00920452	0.0024454	0.00151314	0.00222617	0.00818926	0.00377554	0.00327132	0.00257008	0.0038469	0.00940523	0.00590059	0.00805705	0.0143615	0.00112478	0.000859175	0.00224673	0.00444677	0.0234138	0.0208197	0.0137116	0.0519056
RF39	0.00389109	0.00965934	0.00820025	0.00369219	0.00274795	0.00687285	0.00417094	0.00725671	0.00730911	0.00402056	0.00211701	0.00170438	0.00117893	0.00340112	0.00322191	0.0027382	0.00170228	0.00233934	0.00133758	0.000901232	0.00324996
Rhizobiales	0.0216256	0.0121795	0.00883153	0.0180727	0.0180056	0.00612302	0.0089825	0.0216769	0.021361	0.0296732	0.0301426	0.0339274	0.0389153	0.0177617	0.00819796	0.0172179	0.0160118	0.0305063	0.0353461	0.0242856	0.0352934
Rhodobacterales	0.0107199	0.00404714	0.00294493	0.00664686	0.00669699	0.00272427	0.0040528	0.00341418	0.00364387	0.0157938	0.0165922	0.0138261	0.0218673	0.00549983	0.00705239	0.00650614	0.00652425	0.0201971	0.0242481	0.0169706	0.0251487
Rhodocyclales	0.00171803	0.00156234	0.00128536	0.00229133	0.00259933	0.001569	0.00211727	0.00114646	0.00117972	0.00192053	0.00159901	0.00246618	0.00259006	0.00200407	0.00171835	0.00217652	0.00176597	0.00111204	0.00143935	0.00101567	0.000802073
Rickettsiales	0.00150511	0.00114119	0.0017572	0.00239992	0.00174704	0.00176343	0.00278062	0.000907089	0.00205168	0.000861548	0.00144137	0.0010846	0.000643051	0.00128546	0.00214794	0.00238715	0.000972731	0.00117984	0.00151205	0.000600821	0.00143748
Sphingobacteriales	0.031497	0.0201812	0.0124142	0.0300898	0.0275217	0.0146011	0.0156432	0.0105323	0.0102905	0.039105	0.0318303	0.0371087	0.0384936	0.0240268	0.0120285	0.0191206	0.0176133	0.0617974	0.0735672	0.0504338	0.0835415
Sphingomonadales	0.00114405	0.000570594	0.00047184	0.000696811	0.00101607	0.000120576	0.000399828	0.000579529	0.000683893	0.00126839	0.00156448	0.00186448	0.00239358	0.000742712	0.000930773	0.00109996	0.000984311	0.00174061	0.00189878	0.001359	0.00249476
Thermoproteales	0.0216459	0.0452399	0.0580851	0.0190039	0.020273	0.0455326	0.0328768	0.0361324	0.0298776	0.0170874	0.011621	0.0122405	0.00643051	0.0202461	0.0107397	0.0144633	0.0113948	0.0151752	0.00593188	0.00656612	0.0139998
Unclassified	0.0367599	0.086349	0.0797422	0.0326279	0.0279038	0.058608	0.0407548	0.057026	0.0550753	0.0363649	0.0300489	0.025075	0.0197202	0.0296641	0.0297489	0.028201	0.0204505	0.0217391	0.016017	0.0118615	0.0282207
Xanthomonadales	0.0306905	0.0342842	0.0275294	0.0430094	0.0449717	0.0245826	0.0302533	0.0299699	0.030308	0.0435458	0.0458172	0.0340026	0.0283708	0.0290811	0.0424167	0.0367633	0.0250661	0.0122188	0.0102049	0.013401	0.0280131
FAMILY
SampleID	mean	A0	B0	C0	D0	A24	B24	C24	D24	AS24	BS24	CS24	DS24	A48	B48	C48	D48	AS48	BS48	CS48	DS48
Actinomycetaceae	0.162746	0.0619384	0.0521786	0.0918006	0.0836342	0.0932753	0.0955588	0.106022	0.103097	0.189823	0.199933	0.220887	0.193085	0.155338	0.172663	0.179186	0.201254	0.26935	0.280446	0.33969	0.165769
Unclassified	0.147995	0.33447	0.312293	0.129924	0.113555	0.250456	0.169367	0.238235	0.227164	0.146233	0.116749	0.0921211	0.085063	0.122774	0.0970607	0.111708	0.0829697	0.0951762	0.0660833	0.0483654	0.120131
Microbacteriaceae	0.0843701	0.0412248	0.0306771	0.0845286	0.0910736	0.0319924	0.0276835	0.0476036	0.0543379	0.0851597	0.0808185	0.128941	0.148885	0.0910463	0.067018	0.0961153	0.0923337	0.116887	0.12318	0.12467	0.123227
Enterobacteriaceae	0.064025	0.0796663	0.099672	0.134811	0.106676	0.041957	0.0591387	0.0627726	0.0522028	0.056684	0.0527567	0.0524044	0.0697368	0.0547843	0.0773194	0.0676449	0.0596903	0.0333565	0.0413317	0.0637846	0.0141091
Lachnospiraceae	0.0420209	0.0268498	0.0322577	0.0263485	0.0447451	0.0584046	0.0739471	0.0581415	0.0759403	0.0264299	0.0402628	0.0427436	0.03023	0.0686375	0.0580102	0.0733571	0.0623234	0.0103182	0.0113584	0.00901529	0.0110973
Campylobacteraceae	0.0417611	0.0352859	0.0265216	0.0241982	0.0494877	0.0765086	0.105844	0.0421314	0.0345638	0.029435	0.0337155	0.0338979	0.0188344	0.032068	0.0561655	0.0402635	0.0464079	0.0388533	0.0297916	0.0337561	0.0474911
Comamonadaceae	0.032908	0.0307692	0.0211567	0.0415534	0.044093	0.0289318	0.0371188	0.0307681	0.0320395	0.0412755	0.0373299	0.0325321	0.0379374	0.0448351	0.0349142	0.0362539	0.0369371	0.0236304	0.0250542	0.0209975	0.0200325
Xanthomonadaceae	0.03013	0.0332515	0.0270724	0.04199	0.0441389	0.0243185	0.0296233	0.029416	0.0298481	0.0430483	0.045165	0.0334542	0.028221	0.0286348	0.0413947	0.0360164	0.0244923	0.0119152	0.0100357	0.0131036	0.0274598
Sphingobacteriaceae	0.0280227	0.0199528	0.0118639	0.0290938	0.0263111	0.0139722	0.0141827	0.00938946	0.00962366	0.0356392	0.0290226	0.0320157	0.033927	0.0219982	0.0112417	0.0167921	0.0159567	0.0535986	0.0635385	0.0420941	0.0702405
Enterococcaceae	0.0279269	0.0190871	0.038419	0.0400818	0.0449992	0.0219389	0.0286897	0.0316014	0.0447524	0.015724	0.0233971	0.0249491	0.030314	0.0321519	0.0477843	0.0336407	0.0402741	0.00982524	0.0133102	0.00971961	0.00787853
Thermoproteaceae	0.0216507	0.045195	0.0580994	0.0190094	0.020275	0.0455462	0.0329037	0.0361949	0.0299308	0.0170894	0.0116271	0.0122383	0.00644524	0.0202523	0.0108094	0.014333	0.0114027	0.0151771	0.005935	0.00654617	0.0140045
Bacillaceae	0.0175761	0.0275188	0.0156861	0.0230576	0.0147758	0.0398755	0.0221896	0.0188126	0.0198573	0.017919	0.0144583	0.00730398	0.00645088	0.0272571	0.0105487	0.0157312	0.00894307	0.0219026	0.00794045	0.00958478	0.0217086
Weeksellaceae	0.0146128	0.0199502	0.022461	0.0369354	0.0383951	0.0155522	0.0177642	0.00564125	0.0097821	0.0125549	0.0103111	0.00731974	0.00687492	0.0252351	0.0124308	0.007574	0.0171144	0.00645741	0.00620848	0.0085508	0.00514228
Beutenbergiaceae	0.0135232	0.0059145	0.00401976	0.00527739	0.00614559	0.00751565	0.00800312	0.00959139	0.00867093	0.0201889	0.0168096	0.0223336	0.0199803	0.00902782	0.012755	0.0132557	0.0149602	0.0216198	0.0233231	0.0261095	0.0149631
Leuconostocaceae	0.0114525	0.00110948	0.0080362	0.00700086	0.00550915	0.0068658	0.0194423	0.0372849	0.020855	0.00089037	0.00192883	0.00210684	0.00240622	0.0179191	0.0501984	0.0171222	0.0249227	0.000545238	0.0018736	0.0022332	0.000800257
Porphyromonadaceae	0.010479	0.00671943	0.00401488	0.00588298	0.00787761	0.0173577	0.0185891	0.00931374	0.00638223	0.00876371	0.0158692	0.00726552	0.00534955	0.0154134	0.0102256	0.0126257	0.0100932	0.0112933	0.011195	0.0110385	0.0143087
Moraxellaceae	0.0103636	0.0157551	0.0198205	0.0364436	0.0233226	0.0119987	0.011649	0.0108675	0.0163199	0.00679162	0.00847626	0.00749791	0.00626825	0.005557	0.0034734	0.00568402	0.00636995	0.00202023	0.00197058	0.00476542	0.00222051
Rhodobacteraceae	0.0102259	0.00396884	0.00287242	0.00624144	0.00635185	0.00265724	0.00372872	0.00342009	0.00326498	0.0150776	0.0156995	0.0135912	0.0209506	0.0050997	0.00709814	0.00608917	0.00628537	0.0194673	0.0236499	0.0165345	0.0224687
Puniceicoccaceae	0.0092095	0.00244738	0.00151351	0.00222682	0.00819008	0.00377667	0.003274	0.00257453	0.00385375	0.00940634	0.00590366	0.00805559	0.0143944	0.00112513	0.000864748	0.00224831	0.00444982	0.0234168	0.0208307	0.0137148	0.0519229
MSP41	0.00858883	0.0214146	0.020408	0.0072779	0.00757127	0.0180014	0.0104768	0.0142356	0.0141946	0.00893961	0.00644445	0.00395034	0.0031152	0.00685794	0.00237806	0.00533974	0.00448458	0.00496411	0.00322934	0.00217848	0.00631453
Fervidicoccaceae	0.0083626	0.0181922	0.0238256	0.00863572	0.00677046	0.016147	0.0115681	0.0124183	0.0100197	0.00890371	0.00594872	0.00387288	0.00343746	0.00835811	0.00605324	0.00449662	0.00618803	0.00394687	0.00180378	0.00203897	0.00462649
Cryomorphaceae	0.00824173	0.00043509	0.000748619	0.000796586	0.00173508	0.00343745	0.00578408	0.00237261	0.00338274	0.00787454	0.0176658	0.00697118	0.0146092	0.00709012	0.00259424	0.00641705	0.00697603	0.0127629	0.0266884	0.0101091	0.0263837
Corynebacteriaceae	0.00805892	0.0040681	0.00321744	0.00595446	0.00605456	0.00458627	0.00395427	0.00520965	0.00535672	0.00804203	0.00922049	0.00782323	0.00725448	0.010269	0.00975725	0.009738	0.00999119	0.0137612	0.0109331	0.0177031	0.00828387
Flavobacteriaceae	0.00805224	0.0083007	0.00671723	0.0144291	0.0143296	0.00639245	0.00640704	0.00239785	0.00305088	0.0118118	0.010541	0.00784903	0.0062125	0.00684454	0.00212584	0.00374718	0.00491334	0.0104606	0.0103281	0.00887489	0.0153112
Orbaceae	0.00697671	0.00605319	0.00676682	0.00886376	0.00809535	0.00976949	0.0136415	0.010389	0.00703953	0.00456675	0.00528176	0.0038419	0.00339449	0.00702934	0.0100311	0.00935861	0.00914988	0.00374341	0.00464326	0.00451144	0.00336359
Desulfurococcaceae	0.00675844	0.0152553	0.0183574	0.00575715	0.00604246	0.0144282	0.0093309	0.00787504	0.0118182	0.00646237	0.00351516	0.0030983	0.0025781	0.00562565	0.00216187	0.00491818	0.00431076	0.00451652	0.00221108	0.00171703	0.00518917
Pseudomonadaceae	0.00671357	0.0134533	0.0150085	0.0152537	0.0150557	0.0048472	0.00698863	0.00634547	0.00763166	0.00697331	0.00752382	0.00521498	0.00531255	0.0037481	0.00365356	0.00432387	0.00352592	0.00202168	0.00135851	0.00252157	0.00350946
Ruminococcaceae	0.00662336	0.00325774	0.00274711	0.00254636	0.00548067	0.00934894	0.00985837	0.0069058	0.0117218	0.00396	0.00697172	0.0054272	0.00706828	0.0102797	0.00865469	0.0111736	0.0159579	0.00259938	0.00320316	0.00196421	0.00334066
Aerococcaceae	0.0066018	0.00455621	0.00668875	0.00829898	0.0128184	0.00471518	0.00548668	0.00591385	0.00885077	0.00517349	0.00603886	0.00651418	0.0136102	0.00599534	0.0115012	0.00565591	0.00778718	0.00332026	0.00297041	0.00239203	0.00374808
Micrococcaceae	0.00559454	0.00202317	0.00210671	0.00535614	0.00313286	0.00294746	0.00374418	0.00558825	0.00598829	0.00425678	0.00495276	0.00539363	0.00441141	0.0113852	0.0103914	0.00911268	0.00886836	0.00657879	0.00557619	0.00619917	0.00387729
Brucellaceae	0.00528741	0.00456844	0.00330369	0.006771	0.00783817	0.00221625	0.00296479	0.00262501	0.0028689	0.00904734	0.00629423	0.00728101	0.0078059	0.00490236	0.00245012	0.00440294	0.00521463	0.0072427	0.00594471	0.00570193	0.00630412
Bacteriovoracaceae	0.00520099	0.00289607	0.00593199	0.00888013	0.00911829	0.00357314	0.00613875	0.00325603	0.00256917	0.00904732	0.00896815	0.00852033	0.0103124	0.00592033	0.00302662	0.00358324	0.00298972	0.00158689	0.0021238	0.00332674	0.00225072
Streptococcaceae	0.00495113	0.0029559	0.00640311	0.00628034	0.0079401	0.00342614	0.00525294	0.00624199	0.00782955	0.00259213	0.00393728	0.00428857	0.00629485	0.00465946	0.0116597	0.00546755	0.00722861	0.00188053	0.00218587	0.00142585	0.00107222
Lactobacillaceae	0.00487416	0.00227658	0.00543852	0.00524992	0.00702723	0.00385507	0.00615537	0.00786639	0.00668534	0.00229192	0.0035731	0.00354497	0.00601658	0.00445715	0.0139924	0.00540598	0.00755038	0.0015369	0.00189327	0.00142994	0.00123611
Intrasporangiaceae	0.00463113	0.00206668	0.00119616	0.00238976	0.00260262	0.00271378	0.00259192	0.00371036	0.00316864	0.00563662	0.00694018	0.00748757	0.00601556	0.0046434	0.00605324	0.00538658	0.00683696	0.00605594	0.00666233	0.00667137	0.00379289
Pyrodictiaceae	0.00418753	0.0106053	0.0107411	0.00434502	0.00313043	0.00814133	0.0060569	0.00636061	0.00693675	0.00380562	0.00189278	0.00185898	0.00128905	0.00321466	0.000864748	0.00295091	0.00208585	0.00276688	0.00162922	0.00107314	0.00400129
Hyphomicrobiaceae	0.00416863	0.00133246	0.00133856	0.00230376	0.00192618	0.000708597	0.00115954	0.00162801	0.00125247	0.00543557	0.00676743	0.00557695	0.00714347	0.0015984	0.00151331	0.00155742	0.00177877	0.00887504	0.0135429	0.00772734	0.0102064
Bacteroidaceae	0.00415898	0.00137597	0.00189596	0.00174163	0.00214277	0.00950566	0.00970915	0.0040082	0.00358827	0.0018334	0.00491222	0.00185382	0.00128905	0.00793479	0.00662973	0.0096818	0.00629694	0.00220673	0.0017999	0.00196027	0.00281341
Nocardioidaceae	0.00412191	0.00178115	0.00117175	0.00374758	0.0032912	0.00192603	0.0023009	0.00275122	0.00310441	0.00426636	0.00540793	0.00493147	0.00515619	0.00504076	0.00403549	0.00502357	0.00585198	0.00525233	0.00603683	0.00734924	0.00401171
Phyllobacteriaceae	0.00405107	0.00183554	0.00175763	0.00429976	0.00430131	0.00153027	0.00146421	0.00209496	0.00203392	0.00619909	0.00480705	0.00586096	0.00841462	0.00348255	0.00129712	0.00323195	0.00345324	0.00627973	0.00705994	0.00509456	0.00652293
Carnobacteriaceae	0.00387691	0.00271387	0.00452508	0.00486008	0.00660848	0.00295198	0.00506561	0.00532827	0.00592407	0.0023456	0.00273401	0.00320933	0.00535313	0.00381741	0.00703328	0.00422027	0.00567699	0.00119898	0.00154873	0.00123411	0.00118892
Bradyrhizobiaceae	0.00371953	0.00267852	0.000638767	0.00108625	0.000516885	0.000644522	0.00140236	0.0119236	0.0117175	0.00354114	0.00571138	0.00806592	0.00791332	0.00430943	0.000540468	0.00372845	0.00181817	0.00174083	0.000871825	0.000618845	0.00492242
Streptomycetaceae	0.00359729	0.00121009	0.00105783	0.00157054	0.00185642	0.00273263	0.00257828	0.00306672	0.00244071	0.00508014	0.00529528	0.00617079	0.00451167	0.0025628	0.00562086	0.00391112	0.00403845	0.00461823	0.00596893	0.00451259	0.00314164
Chitinophagaceae	0.00340554	0.000271931	0.000439407	0.000878055	0.00114054	0.000497525	0.00129141	0.00116106	0.000556652	0.00325512	0.00261384	0.00498311	0.00458328	0.00205381	0.000864748	0.00234199	0.00157598	0.00800222	0.0100662	0.00840276	0.0131312
Alcaligenaceae	0.00335981	0.00194431	0.00178204	0.00455774	0.00351871	0.00159434	0.00242822	0.0022464	0.00123106	0.0049485	0.00451412	0.00380833	0.00409989	0.00292444	0.00230599	0.00230686	0.00206847	0.00498108	0.00671084	0.00393663	0.00528816
Caulobacteraceae	0.00297553	0.00195791	0.00180645	0.00225398	0.0034823	0.00126643	0.00190983	0.00333175	0.00192687	0.00323119	0.00371044	0.00364051	0.00533523	0.00408976	0.00425168	0.00337247	0.00333736	0.00219045	0.00262808	0.00207832	0.00370953
Brevibacteriaceae	0.0028785	0.00106053	0.00082999	0.00228113	0.00144388	0.00203533	0.00218267	0.00267549	0.00282608	0.00277643	0.00303445	0.00382124	0.00329423	0.00391117	0.00331487	0.00370035	0.00382406	0.00341791	0.00407304	0.00414947	0.0029176
Rhizobiaceae	0.00256622	0.00111492	0.00115141	0.00233997	0.00245702	0.00065206	0.00137326	0.00129989	0.00150938	0.00352438	0.00373297	0.00374378	0.00442215	0.00227705	0.00176553	0.00261132	0.00272899	0.00343147	0.00410698	0.00298155	0.00410027
Helicobacteraceae	0.00255374	0.00164518	0.00189189	0.00138497	0.00303943	0.00434205	0.00665715	0.002991	0.00219449	0.00181904	0.00214064	0.00196226	0.000608717	0.00227705	0.00302662	0.00279868	0.00294916	0.00255326	0.00192985	0.00199784	0.0028655
Erysipelotrichaceae	0.00234746	0.00368661	0.00381749	0.00202509	0.00232138	0.00356829	0.00270495	0.00315146	0.00299889	0.00199684	0.00177582	0.00134444	0.00113559	0.00191476	0.00368547	0.0026431	0.0027861	0.00135631	0.00116096	0.00110431	0.0017714
Dermatophilaceae	0.0021168	0.00106053	0.000512641	0.00111341	0.00112841	0.00119858	0.00120047	0.00181732	0.0010919	0.00257298	0.00270397	0.00286593	0.00214841	0.00251815	0.00237806	0.00295091	0.00396312	0.0030924	0.00314206	0.00287602	0.00200064
Dermacoccaceae	0.0021103	0.00106053	0.000732345	0.00138497	0.00121941	0.00108551	0.000763934	0.00189304	0.00115612	0.00222593	0.00202797	0.00193644	0.00161131	0.00222347	0.00345899	0.00245909	0.00365024	0.00402825	0.00343299	0.00357356	0.00228198
Cellulomonadaceae	0.00206235	0.000815794	0.000585876	0.00133971	0.000994943	0.00128151	0.00132779	0.0010601	0.000856389	0.00272856	0.00312458	0.0040278	0.0025781	0.00235741	0.00288249	0.00243567	0.00345324	0.00264481	0.00267657	0.00232515	0.00175056
Cerasicoccaceae	0.0020262	0.000489476	0.000292938	0.000651752	0.00163802	0.000814133	0.000436534	0.000454329	0.00166996	0.00229773	0.00117172	0.000929491	0.0036523	0.000214311	0	0.000702597	0.00111245	0.00471997	0.0046549	0.00330528	0.0113161
Methanomicrobiaceae	0.00180606	0.00339914	0.00451613	0.00208199	0.00122548	0.00424404	0.00266467	0.00328127	0.0019911	0.00169936	0.00135198	0.00100695	0.000429683	0.00219668	0.00108094	0.000843116	0.00066052	0.000915512	0.000484886	0.000547302	0.00150048
Rhodocyclaceae	0.0017196	0.00156361	0.00128567	0.00229199	0.00259959	0.00156947	0.00211901	0.00114844	0.00118182	0.00192076	0.00159985	0.00246573	0.002596	0.0020047	0.0017295	0.00217805	0.00176718	0.00111218	0.00144011	0.00101591	0.000802341
Propionibacteriaceae	0.00169749	0.000584652	0.000528916	0.00124919	0.000897875	0.000919668	0.000636611	0.000908658	0.00171278	0.00189084	0.00175758	0.00245282	0.00229164	0.00249136	0.00295456	0.00220147	0.00244508	0.00221757	0.00203652	0.00227149	0.00150048
Tissierellaceae	0.0016965	0.00186467	0.00107411	0.000543127	0.00178361	0.00269438	0.00250227	0.00203367	0.00267927	0.00133351	0.00203441	0.00128358	0.00101282	0.00264061	0.00154419	0.00190705	0.0017978	0.00114512	0.00149622	0.000692942	0.00186667
Pseudonocardiaceae	0.00147923	0.000387502	0.000378378	0.000896159	0.000737107	0.000663367	0.000754839	0.00121154	0.000545948	0.00226781	0.00191531	0.00170407	0.00136066	0.00178592	0.0021979	0.00120612	0.00190624	0.00277366	0.00237109	0.00288497	0.00163594
Pasteurellaceae	0.00138623	0.00129711	0.00132636	0.00195707	0.00173509	0.00156344	0.00218631	0.0020041	0.00124176	0.00097893	0.00103051	0.000862361	0.000823559	0.00160197	0.00171508	0.00184549	0.00189117	0.000914156	0.00103184	0.00118904	0.000529337
Gemellaceae	0.00122276	0.000958558	0.00153792	0.00145286	0.00193832	0.00102897	0.0011459	0.00102224	0.00205533	0.000843698	0.00123932	0.00116186	0.00236325	0.000924214	0.00226996	0.000948506	0.00189465	0.000335688	0.00050913	0.000418525	0.000406381
Alteromonadaceae	0.00120173	0.000690706	0.00162964	0.00559926	0.00104781	0.000337966	0.000513446	0.000795677	0.000680829	0.00162876	0.00190129	0.00237537	0.00151105	0.000333074	0.000432374	0.000665125	0.000327446	0.000732409	0.0010383	0.000811875	0.00098226
Sanguibacteraceae	0.00116478	0.000360309	0.000423133	0.000823742	0.000664306	0.000572908	0.00037742	0.00114844	0.000524538	0.00116083	0.00117923	0.00130387	0.00202309	0.00109388	0.00169347	0.00133493	0.00143113	0.00170896	0.00192985	0.00235376	0.00118788
Clostridiaceae	0.00110384	0.000750142	0.000754005	0.00080719	0.00117062	0.00150733	0.0018641	0.00149135	0.00222131	0.000902253	0.00110394	0.00129016	0.000601812	0.00143747	0.00117616	0.00133728	0.00141901	0.000523957	0.000733771	0.000356045	0.000628922
Promicromonosporaceae	0.00108594	0.000455485	0.000394652	0.000678909	0.000533872	0.000501295	0.000532025	0.000896038	0.000631586	0.00138223	0.00124683	0.00149751	0.00180825	0.0010269	0.00154934	0.00119442	0.00173242	0.00156315	0.00130434	0.00151313	0.00127645
Oxalobacteraceae	0.00100713	0.000836189	0.00062412	0.00142571	0.00139171	0.000883485	0.00115954	0.000542671	0.000807146	0.00127093	0.00142108	0.00116186	0.00123534	0.0012689	0.000720623	0.000796277	0.00101975	0.000786662	0.00120737	0.000640308	0.000943011
GENUS
SampleID	mean	A0	B0	C0	D0	A24	B24	C24	D24	AS24	BS24	CS24	DS24	A48	B48	C48	D48	AS48	BS48	CS48	DS48
Act_Actinomyces	0.153407	0.0580084	0.0488481	0.0855178	0.0777776	0.0870401	0.0891078	0.10017	0.0974053	0.178242	0.188439	0.209975	0.184342	0.145727	0.162624	0.169956	0.189005	0.254025	0.264725	0.320139	0.157068
Unclassified	0.149314	0.337191	0.313926	0.130685	0.114052	0.251632	0.170442	0.241067	0.230078	0.147321	0.117873	0.0934824	0.0865132	0.123455	0.100383	0.113157	0.0836191	0.0955649	0.06647	0.0484659	0.120899
Mic_Microbacterium	0.0382228	0.0213832	0.0157051	0.0505882	0.0540718	0.011724	0.0121357	0.0246721	0.0235493	0.038267	0.034853	0.0581656	0.0723249	0.0371195	0.0205701	0.0448378	0.0345458	0.0487816	0.0520889	0.0553386	0.0537333
Cam_Campylobacter	0.0368917	0.0316911	0.0232837	0.0213243	0.044103	0.0679512	0.0929365	0.0380553	0.0301413	0.0259454	0.029484	0.0300391	0.0173347	0.0282662	0.0497111	0.0360125	0.0402451	0.0338453	0.0263567	0.0296177	0.0414902
Ent_Enterococcus	0.0255773	0.0173672	0.0346662	0.0369491	0.0404605	0.0198501	0.0260647	0.0291674	0.0408317	0.014311	0.0214004	0.0227422	0.0275314	0.0293431	0.0456863	0.0309123	0.0368224	0.0089747	0.0123493	0.00893261	0.00718329
Ent_Enterobacter	0.023066	0.0267789	0.0376683	0.0501678	0.0399931	0.0140669	0.0191495	0.024902	0.0186486	0.020656	0.0206191	0.0186924	0.0282807	0.0174181	0.0229763	0.0223715	0.0192925	0.0119697	0.0168961	0.0254398	0.00533169
Mic_Leucobacter;	0.0221117	0.0106916	0.00809792	0.0172634	0.0159766	0.0100426	0.0073034	0.00766215	0.014702	0.0209781	0.020384	0.0325413	0.0384567	0.0293077	0.0245947	0.0240558	0.0273283	0.0350133	0.0331847	0.0316804	0.0329699
The_Pyrobaculum	0.0217804	0.0454805	0.0583541	0.0191208	0.0202541	0.0457145	0.0330575	0.0364718	0.0300546	0.0171442	0.011739	0.0124191	0.00655513	0.0203645	0.0111794	0.0145189	0.0114218	0.0151983	0.00596973	0.00655977	0.0140311
Sph_Sphingobacterium	0.0207059	0.0158455	0.00894859	0.0225081	0.0206076	0.0114361	0.0112754	0.00715134	0.00819669	0.026476	0.0218399	0.0231615	0.0246182	0.0179941	0.00849634	0.0134276	0.013197	0.0371098	0.042295	0.0299961	0.049538
Bac_Bacillus	0.0174232	0.027503	0.0153947	0.0228085	0.0142735	0.0397734	0.0219605	0.0188672	0.0196487	0.017905	0.0143535	0.00724161	0.0060492	0.0271293	0.0103261	0.0157071	0.00856305	0.0219002	0.00783717	0.00949996	0.0217215
Xan_Stenotrophomonas	0.0162498	0.0175804	0.0140118	0.0230518	0.0236088	0.0136628	0.0160554	0.0171231	0.0164833	0.0228968	0.0266716	0.0177042	0.01439	0.0161059	0.0195586	0.0201618	0.0129934	0.00612834	0.00515872	0.00740625	0.0142438
Com_Comamonas	0.0141622	0.0142555	0.00871138	0.0182377	0.0192549	0.0132387	0.0165654	0.0125915	0.0133143	0.0187838	0.0171383	0.0144104	0.014749	0.0192333	0.0117011	0.017437	0.0162801	0.00939675	0.0101251	0.0095458	0.00827395
Wee_Wautersiella	0.013645	0.0189571	0.0207847	0.034718	0.0359565	0.0144959	0.0162405	0.0053252	0.00887976	0.0114837	0.00960049	0.00679909	0.00628199	0.0235297	0.0122973	0.00711711	0.0162393	0.00592406	0.0056771	0.00795237	0.00464032
Ent_Klebsiella	0.0129653	0.0178468	0.0181917	0.0227902	0.0222588	0.00888388	0.0126482	0.011953	0.0125553	0.0129727	0.00967632	0.0108471	0.0137293	0.0124809	0.0179616	0.0141156	0.0124846	0.00535889	0.00636967	0.0141268	0.00205537
Leu_Weissella	0.0112877	0.00093757	0.00758744	0.00657752	0.00511832	0.00665264	0.0191208	0.0373296	0.0205046	0.00081019	0.0016562	0.00191789	0.00214134	0.0176924	0.0507989	0.0170525	0.0247078	0.0004821	0.0017441	0.00215504	0.00076762
Mor_Acinetobacter	0.00992642	0.015246	0.0190481	0.0349088	0.0222748	0.0114711	0.0108552	0.0104833	0.0157162	0.00629962	0.00809377	0.0073729	0.00602551	0.00524299	0.00341344	0.00560829	0.00613601	0.0018957	0.00191773	0.00450755	0.00201133
Lac_Lachnospiraceae_Group	0.00887181	0.00535266	0.00635973	0.00505792	0.00918257	0.0135833	0.0144283	0.0134343	0.0182583	0.00629344	0.00871324	0.0100087	0.00471605	0.0140432	0.0103968	0.0155628	0.0141021	0.00173636	0.00202405	0.00168654	0.00249581
MSP_MSP41_Group	0.00865917	0.0215888	0.0205147	0.00732054	0.00760442	0.0180859	0.0105433	0.0144048	0.0143768	0.00900612	0.00650649	0.00400871	0.00316831	0.00689593	0.00245947	0.00540901	0.00451968	0.00498439	0.00324824	0.002183	0.00635488
Por_Dysgonomonas	0.00853747	0.00551029	0.00341912	0.00517173	0.00681227	0.0135871	0.0144786	0.00796863	0.00507415	0.00728207	0.012376	0.00534495	0.00444292	0.0133967	0.0079001	0.0116721	0.00866567	0.00904267	0.00913018	0.00888264	0.0105915
Cor_Corynebacterium	0.00809495	0.0041012	0.0032179	0.00593472	0.00603232	0.00460779	0.00394274	0.00522049	0.00542545	0.00805364	0.00930926	0.00793883	0.00737817	0.0101822	0.0100913	0.00986433	0.00999932	0.0137357	0.0108996	0.0177112	0.00825292
Cry_Fluviicola	0.00794645	0.0003838	0.00055622	0.00050989	0.00142583	0.00309004	0.00538146	0.00219648	0.00325266	0.00754731	0.0173506	0.00649778	0.0147126	0.00687799	0.00268305	0.00626306	0.00670362	0.0122158	0.0258691	0.00963542	0.0257763
Pun_Cerasicoccus	0.00686336	0.00205608	0.0011288	0.00169356	0.00606891	0.00286284	0.00225142	0.00168567	0.00260213	0.00694448	0.004186	0.00581656	0.00917718	0.00107749	0.00089435	0.00156577	0.00392407	0.0167508	0.0159778	0.0107752	0.0398281
Beu_Serinibacter	0.00682185	0.003043	0.00188133	0.00262228	0.00287603	0.00363535	0.0034778	0.00515919	0.0045971	0.00986214	0.00840233	0.0108471	0.00954134	0.0046332	0.00655857	0.00702221	0.00721749	0.0112353	0.0122516	0.013478	0.00809568
Pse_Pseudomonas	0.00660675	0.0132269	0.0147802	0.0150062	0.014753	0.00466925	0.00688195	0.00619102	0.00749104	0.00688655	0.00729292	0.00526584	0.00527566	0.0036656	0.0037041	0.00432065	0.00349512	0.00198568	0.0013372	0.0024372	0.00346897
Fer_Fervidicoccaceae_Group	0.00593944	0.0129122	0.0165394	0.00661034	0.00449684	0.0113605	0.00829183	0.00842837	0.0080666	0.00629344	0.003822	0.00298688	0.00240355	0.00549519	0.00491893	0.00298919	0.00427443	0.00302332	0.00122906	0.00131195	0.00333474
Lac_Lachnospiraceae	0.00585448	0.00358443	0.00379539	0.00343719	0.00615116	0.00811893	0.0104334	0.00800695	0.00968209	0.0038701	0.00635482	0.00492574	0.00437008	0.0104382	0.0104341	0.00991651	0.00805836	0.00138228	0.00142415	0.00120083	0.00150483
Aer_Facklamia	0.00530353	0.00375029	0.00534953	0.00669502	0.0100228	0.0038512	0.00434086	0.00510299	0.00665495	0.00390989	0.00511874	0.00570652	0.0107286	0.00496453	0.00910003	0.00455495	0.00641164	0.00266991	0.00232937	0.0018862	0.00292262
Beu_Beutenbergia	0.00499531	0.00217945	0.0018159	0.00215792	0.00246778	0.00274923	0.00345951	0.00306486	0.0029274	0.00741468	0.00596049	0.00825323	0.00721064	0.0032594	0.00514252	0.0037009	0.00522041	0.00821198	0.00869123	0.0103558	0.00566276
Lac_Lactobacillus	0.00485871	0.00226691	0.00537161	0.00522449	0.00689504	0.00377838	0.0060987	0.00784605	0.00660384	0.00228003	0.0035529	0.00353448	0.00607546	0.00442027	0.014382	0.00536224	0.00746333	0.00151049	0.00187258	0.00140403	0.00123143
Bac_Peredibacter	0.00478059	0.00275515	0.00552131	0.00783954	0.00842701	0.00329453	0.00576584	0.00306486	0.00240697	0.00839125	0.00846299	0.00770301	0.00928643	0.00541438	0.00268305	0.00327387	0.00290801	0.00142995	0.00198991	0.0030433	0.00195051
Mic_Pseudoclavibacter	0.00473833	0.00106916	0.00132511	0.0030047	0.00372909	0.00204488	0.00164738	0.00306486	0.00364298	0.00520836	0.00464099	0.0073886	0.00895867	0.00452545	0.00581328	0.0074018	0.00686712	0.00584235	0.00632089	0.00597907	0.00629196
Lac_Blautia	0.00470984	0.00213832	0.00378721	0.00278618	0.00340005	0.0061195	0.00750475	0.00715134	0.00670048	0.00243539	0.00456516	0.00503054	0.00400591	0.00901499	0.0105832	0.00759159	0.00711821	0.0009533	0.00139489	0.00113989	0.00077601
Fla_Flavobacterium	0.00436032	0.00394082	0.00316964	0.0089276	0.0086677	0.00330211	0.00316206	0.0010727	0.00162633	0.00614876	0.00542208	0.00437552	0.00420621	0.00299901	0.00089435	0.00190976	0.00258101	0.0053657	0.00563808	0.00472088	0.00907615
Lac_Dorea	0.00412713	0.00263178	0.00301013	0.00253123	0.004899	0.00627097	0.00823692	0.00413756	0.00967125	0.00202547	0.00436799	0.00534495	0.00240355	0.00684205	0.00357741	0.0074018	0.00560581	0.00091244	0.00095594	0.00070975	0.00100671
Ent_Citrobacter	0.00402057	0.00590193	0.00650521	0.00736737	0.00769581	0.00274058	0.00436687	0.00318891	0.00353456	0.00336201	0.00204316	0.00229818	0.00425563	0.00377634	0.00632434	0.00540223	0.00457307	0.00141438	0.00210696	0.00302947	0.00052433
Act_Varibaculum	0.0040063	0.00180935	0.00132511	0.00180282	0.00193766	0.00293857	0.0030019	0.00306486	0.00294908	0.00421973	0.00558132	0.00586896	0.00473426	0.00366346	0.00491893	0.00408048	0.00471822	0.0058696	0.00647698	0.00759932	0.00356544
Ent_Enterobacteriaceae_Group	0.0039624	0.00492774	0.00491064	0.00659734	0.0050583	0.00258369	0.00339073	0.00415033	0.00287628	0.002351	0.00251766	0.00185277	0.00403973	0.00482625	0.0104863	0.0059089	0.00588777	0.00129522	0.00225398	0.00235814	0.00097525
Bac_Bacteroides	0.00394495	0.00127203	0.00187643	0.00164257	0.00195473	0.00908677	0.00911545	0.00402519	0.00360829	0.00161556	0.0043953	0.00172401	0.00109252	0.00777402	0.00632008	0.00960812	0.00619207	0.0018317	0.00154121	0.00170625	0.00251679
Bru_Ochrobactrum	0.00389645	0.00320749	0.00240483	0.00509889	0.00550833	0.00165105	0.00234294	0.00183892	0.00221181	0.00672747	0.00453482	0.00571176	0.00575395	0.00379814	0.00208682	0.00294174	0.00399413	0.00501164	0.00441877	0.00418677	0.00449875
Hyp_Devosia	0.00356245	0.00093209	0.00099793	0.00187566	0.00140755	0.000530155	0.000933517	0.00114932	0.00078064	0.00462965	0.00599083	0.00479473	0.00622737	0.00113136	0.00111794	0.00118619	0.00128466	0.00789194	0.0122614	0.0070867	0.00903945
Xan_Luteimonas	0.00351605	0.00345422	0.00323917	0.00409732	0.0043506	0.00268107	0.00362424	0.00337135	0.00377309	0.00607642	0.00577849	0.00408731	0.00360532	0.0027476	0.00536611	0.00398558	0.00343356	0.00118481	0.00111201	0.0013012	0.0030516
Ent_Erwinia	0.00350452	0.00476226	0.00601565	0.0134955	0.00411073	0.00152035	0.00222056	0.00367272	0.001977	0.00372025	0.00285046	0.00569827	0.00281558	0.00204774	0.00265324	0.00256149	0.00151891	0.00274238	0.00207965	0.00276506	0.0008626
Lac_Ruminococcus	0.00346856	0.00315266	0.002822	0.00245839	0.00460043	0.00424124	0.00618684	0.00472499	0.00644027	0.00197725	0.00310916	0.00271178	0.00211221	0.00575558	0.00327929	0.00695105	0.0049518	0.00085797	0.00124857	0.00084596	0.00094379
Des_Ignisphaera	0.00327079	0.00674394	0.00966842	0.00267692	0.00266886	0.00672539	0.00477741	0.00413756	0.00559458	0.00361692	0.001183	0.00157204	0.00131103	0.0027476	0.00134153	0.0027045	0.0015416	0.00224706	0.00105348	0.00083879	0.00226511
Cam_Sulfurospirillum	0.00325281	0.00216574	0.0022576	0.00185745	0.00347318	0.00548333	0.00821862	0.00342243	0.00303582	0.00231483	0.00285133	0.00246287	0.00131103	0.00240639	0.00551517	0.00289429	0.00350363	0.00333654	0.00212647	0.00260241	0.00381712
Lac_Lachnoclostridium	0.00323724	0.0022754	0.00270748	0.00280439	0.0033117	0.00449117	0.00611821	0.00533797	0.00679806	0.00162158	0.00194133	0.00201746	0.00265847	0.00495645	0.0048444	0.00531411	0.00499851	0.00055836	0.00060965	0.00067748	0.0007026
Str_Streptococcus	0.00304773	0.00176823	0.00393199	0.00383691	0.00491361	0.00206988	0.00341009	0.00386939	0.00480744	0.00157939	0.00236145	0.00258601	0.00395493	0.00292359	0.00700575	0.00329895	0.00439589	0.00124405	0.00147097	0.00091048	0.00061556
Mic_Agromyces	0.0029107	0.00074019	0.00053986	0.00169356	0.00142583	0.00127237	0.00109826	0.00291162	0.00143117	0.00325523	0.00436799	0.00550215	0.00393307	0.00290922	0.00402458	0.00327387	0.00287298	0.00388128	0.00444804	0.00473163	0.00390102
Orb_Orbaceae_Group	0.00290686	0.00259889	0.00296434	0.00345268	0.00320262	0.00437149	0.00602939	0.00478119	0.00301847	0.00186633	0.0019474	0.00125763	0.00126732	0.00288768	0.00456119	0.00392865	0.00369984	0.00142995	0.00187286	0.00169048	0.00130873
Bre_Brevibacterium	0.00290673	0.00106916	0.00083433	0.0022945	0.0014502	0.00204488	0.00219651	0.00270729	0.00286234	0.00279708	0.00306366	0.00387771	0.0033504	0.00393283	0.00342835	0.00374835	0.00385399	0.00343187	0.00409687	0.00415809	0.00293625
Rum_Ruminococcus	0.00280959	0.00115141	0.00101428	0.00119278	0.00233373	0.00361263	0.00374322	0.00334581	0.00461878	0.0015613	0.00358691	0.00254671	0.00258563	0.00526174	0.002534	0.00647657	0.00689047	0.00053793	0.00124857	0.00065956	0.00128985
Com_Hydrogenophaga	0.00277101	0.00235764	0.00183226	0.00278618	0.00350973	0.00240084	0.00327646	0.00219648	0.00336108	0.00283325	0.00271483	0.00303928	0.00320473	0.00394181	0.00454629	0.00294174	0.00352699	0.00181807	0.00170703	0.00168475	0.00174078
Sph_Sphingobacteriaceae_Group	0.00273666	0.00150779	0.00086705	0.0022945	0.00205953	0.000454418	0.000695562	0.000561891	0.00039032	0.00354458	0.00257833	0.0034585	0.00444292	0.00093382	0.00104341	0.00094895	0.00091094	0.00710886	0.00831082	0.00515459	0.00746648
Pyr_Pyrodictiaceae_Group	0.00269776	0.00674394	0.00716543	0.0030047	0.0019011	0.00495316	0.00395372	0.00536351	0.0040333	0.0024595	0.001274	0.00062882	0.00043701	0.00193948	0.00089435	0.00170811	0.00147152	0.00167508	0.00093643	0.0005807	0.00283138
Chi_Taibaiella	0.00266281	0.00013707	0.00027811	0.00067378	0.00076775	0.000272651	0.000896908	0.000766215	0.00047706	0.00231483	0.002002	0.0035633	0.00400591	0.00149053	0.00044718	0.00204024	0.00114452	0.00667308	0.00792064	0.00693974	0.0104446
Lac_Roseburia	0.0025843	0.00143926	0.001775	0.00132935	0.00213874	0.00332861	0.00393542	0.00413756	0.00331771	0.00135032	0.00324566	0.00319649	0.00196654	0.00430546	0.00372646	0.00540901	0.004508	0.00049027	0.00081938	0.00061655	0.00065017
Des_Aeropyrum	0.00257911	0.00633273	0.0067728	0.00245839	0.00233982	0.00581655	0.00345951	0.0032181	0.00468383	0.00173612	0.001911	0.00062882	0.00065551	0.00242435	0	0.00170811	0.0015416	0.00175679	0.00093643	0.00055919	0.00264262
Bra_Bradyrhizobium	0.00257166	0.00204237	0.00044579	0.00064191	0.00036377	0.000454418	0.000930772	0.00877061	0.0078671	0.00248241	0.00387811	0.0057825	0.00509843	0.00310766	0.00033538	0.00270925	0.00114919	0.00108404	0.00057259	0.00036742	0.00334942
Orb_Gilliamella	0.00255493	0.00217122	0.0021889	0.0033762	0.00310026	0.00342631	0.0045907	0.00373913	0.00255009	0.00173612	0.0020384	0.00157204	0.00126732	0.002489	0.00375627	0.00358703	0.00341955	0.00134007	0.00177922	0.00172489	0.00124581
Rho_Paracoccus	0.00251343	0.00065795	0.00040081	0.00120188	0.00128873	0.000575596	0.000562856	0.000804526	0.00068306	0.00415342	0.0033215	0.0035502	0.00755661	0.00104606	0.0011552	0.00126922	0.00127299	0.00478352	0.00451144	0.0044574	0.00701555
Fer_Fervidicoccus	0.00249508	0.00542805	0.00741082	0.00207598	0.00230326	0.00486228	0.00334968	0.00413756	0.0020817	0.00267652	0.002184	0.00094323	0.00109252	0.00290922	0.00134153	0.00156577	0.00196203	0.00093968	0.00058527	0.00073125	0.00132131
Xan_Lysobacter	0.00248276	0.00333085	0.00274838	0.00415195	0.00394845	0.00115877	0.00175721	0.00222202	0.00221181	0.00321906	0.002821	0.00275108	0.00240355	0.00258597	0.00402458	0.00298919	0.0023124	0.00085797	0.00067306	0.00109688	0.00239095
Ent_Escherichia_Shigella	0.00244276	0.00220882	0.00402793	0.00467096	0.00374739	0.00138165	0.00240308	0.00207608	0.00164492	0.00214431	0.00260216	0.00216718	0.00319953	0.00214343	0.00218264	0.00295191	0.00206714	0.00150485	0.00208327	0.00316417	0.00048388
Ent_Trabulsiella	0.00242463	0.00209133	0.00372995	0.00428463	0.00353063	0.00158397	0.00229849	0.00205784	0.00243485	0.00153977	0.002093	0.00215595	0.00280934	0.00263215	0.0028747	0.0037619	0.00296307	0.00117314	0.00188958	0.00227365	0.0003146
Xan_Pseudoxanthomonas	0.00241864	0.00278256	0.00184044	0.00342354	0.00324772	0.00193128	0.00216906	0.00245189	0.00203833	0.00343607	0.00364	0.00296068	0.0025128	0.00207417	0.00469534	0.00258588	0.00163503	0.00085116	0.00072183	0.00105745	0.00231754
Com_Hylemonella	0.00233581	0.00211091	0.00111244	0.00278618	0.00315632	0.00184797	0.00295614	0.00265621	0.00158296	0.00326728	0.0031395	0.00220086	0.00262205	0.00351082	0.00380099	0.00225375	0.00162335	0.00145037	0.00191188	0.00125818	0.00146812
Ent_Pantoea	0.00223499	0.00357562	0.00389121	0.00610761	0.00413473	0.00136488	0.00149899	0.00207061	0.00112449	0.00219599	0.00201066	0.00184715	0.00266107	0.00177337	0.00084644	0.00178436	0.00188195	0.00153792	0.00174257	0.00220067	0.00044943
Der_Dermacoccus	0.00213106	0.00106916	0.00073617	0.00139309	0.00122475	0.0010906	0.000768779	0.00191554	0.00117096	0.00224249	0.0020475	0.00196505	0.00163878	0.00223579	0.00357741	0.00249099	0.00367881	0.00404471	0.00345308	0.00358099	0.00229657
Rho_Rhodobacter	0.00211047	0.00084985	0.00059712	0.00109262	0.00150199	0.000537728	0.000828268	0.000957769	0.00052043	0.0026946	0.00393574	0.00224016	0.0033504	0.00101015	0.00201229	0.00188604	0.00162919	0.00405152	0.00516499	0.00313292	0.00421561
Act_Arcanobacterium	0.00203899	0.00084299	0.00087114	0.00155698	0.00139841	0.00112847	0.00132706	0.000881148	0.0015938	0.0022666	0.00183516	0.00206986	0.00183908	0.00226721	0.00313023	0.00253844	0.00238247	0.0033025	0.00348234	0.00448249	0.00158348
Com_Variovorax	0.00200641	0.00179564	0.00130875	0.00221255	0.00286994	0.00213577	0.00236125	0.00166013	0.00201665	0.00256801	0.00224466	0.00269867	0.00222146	0.00288228	0.00134153	0.00213513	0.0028029	0.00130738	0.00133636	0.00122234	0.00100671
Cam_Arcobacter	0.00198251	0.00166131	0.00110263	0.00115818	0.0021034	0.00338693	0.00528628	0.00115443	0.00183016	0.00139372	0.00170473	0.00189693	0.00050984	0.00157313	0.00286192	0.00178402	0.00299911	0.00178948	0.00142415	0.00158438	0.00244548
Mic_Rothia	0.00197405	0.00082243	0.00045806	0.00220345	0.00120647	0.000848247	0.000823691	0.00194108	0.00216844	0.00135032	0.00151666	0.00141484	0.00123819	0.00499237	0.00387552	0.00355856	0.00308319	0.00243772	0.00187286	0.00247336	0.00119547
Cau_Brevundimonas	0.00195838	0.00139813	0.0011288	0.00136577	0.00213874	0.000954279	0.00109826	0.00199216	0.00130106	0.00220632	0.0024115	0.00235807	0.00415158	0.0025321	0.00290664	0.00220631	0.00220729	0.00138909	0.00160949	0.00148401	0.00232803
Cer_Cerasicoccus	0.00192037	0.00049346	0.00029447	0.00060094	0.00160863	0.000772511	0.00038439	0.000459729	0.00156128	0.00217015	0.001183	0.00078602	0.00327756	0.0002155	0	0.00071171	0.00112116	0.0043307	0.00438951	0.00316159	0.0108851
Mic_Arthrobacter	0.001918	0.0006415	0.00090549	0.00198219	0.00100478	0.00113074	0.00171603	0.00210454	0.00197762	0.00119599	0.00163041	0.00215894	0.00159144	0.00356559	0.0043376	0.00297495	0.00279823	0.00196107	0.00153926	0.00184749	0.00129614
Ent_Vagococcus	0.00184637	0.00142281	0.00294307	0.00227447	0.00334155	0.00157077	0.00200615	0.0017623	0.00311822	0.0010899	0.00142567	0.00164541	0.00220689	0.00225016	0.00272777	0.00216835	0.00261604	0.00061147	0.00071208	0.00054557	0.00048868
Beu_Salana	0.00183465	0.00074019	0.00034355	0.0005281	0.00082869	0.00116634	0.00111656	0.00148135	0.0012577	0.00306232	0.00260867	0.0035633	0.0035689	0.00118524	0.00149059	0.0027045	0.0026394	0.00226067	0.00251665	0.00232998	0.00130034
Lac_Coprococcus	0.0018127	0.00154549	0.0016339	0.00120416	0.00242513	0.00208843	0.00287835	0.00237527	0.00273224	0.00148294	0.00143704	0.00230566	0.00199385	0.00222681	0.002534	0.00229527	0.00216933	0.00090904	0.00074378	0.00049198	0.00078125
Rho_Rhodobacteraceae_Group	0.00179453	0.00084299	0.00053168	0.0014113	0.00123998	0.000386256	0.000874028	0.000664053	0.00057464	0.00304424	0.00251766	0.00271177	0.00365994	0.00086199	0.00052171	0.00071171	0.00098102	0.00320036	0.0044773	0.00287662	0.00380139
Xan_Thermomonas	0.00178537	0.00185047	0.00127604	0.00191208	0.0026323	0.00154502	0.00181212	0.00191554	0.00169138	0.00256801	0.002457	0.00235807	0.00163878	0.00193948	0.00357741	0.00220631	0.00133138	0.00061283	0.00061453	0.00069899	0.00106963
Int_Kribbia	0.00176552	0.00069907	0.00026993	0.00049168	0.00084087	0.000976999	0.000768779	0.00137919	0.00104085	0.00289353	0.0029575	0.0036157	0.00229429	0.00175092	0.00134153	0.00177928	0.00262772	0.00265562	0.00307266	0.00234431	0.00151007
Str_Streptomyces	0.00176275	0.0005757	0.00052759	0.00072841	0.00085001	0.00128373	0.0012996	0.00148135	0.0011818	0.00298396	0.00243424	0.00297378	0.00243996	0.00121217	0.00216135	0.00202838	0.00241166	0.00236963	0.00279466	0.00192312	0.00159396
Mic_Herbiconiux	0.00174539	0.00049346	0.00044171	0.00060094	0.00076775	0.000590744	0.000329477	0.0010727	0.00091075	0.00159144	0.002002	0.00393011	0.00284055	0.00177786	0	0.00284685	0.00182189	0.00290075	0.00374572	0.00309707	0.00314598
Com_Comamonadaceae_Group	0.00167888	0.00164486	0.00075253	0.00209419	0.00161472	0.00110575	0.00166569	0.00140473	0.00160465	0.00220632	0.00189583	0.00149344	0.00291339	0.00176888	0.002534	0.00206396	0.00159999	0.00152528	0.00155096	0.00108971	0.00104866
Act_Trueperella	0.00167248	0.00065795	0.00042535	0.00111083	0.00097493	0.000772511	0.000915213	0.00112378	0.00065053	0.00217015	0.00233566	0.00136244	0.00225788	0.00150848	0.002534	0.00156576	0.00233575	0.00285989	0.00292634	0.00303255	0.00192954
Hel_Sulfurovum	0.00163761	0.00098692	0.00109608	0.00094694	0.00162081	0.00274165	0.00378898	0.00224756	0.00143117	0.00120564	0.001274	0.00125763	0.00036417	0.00149053	0.00238494	0.00204024	0.00200875	0.0015389	0.00119005	0.00133346	0.0018037
Tis_Sedimentibacter	0.00158521	0.00176235	0.00098157	0.00049168	0.0016713	0.00259667	0.00243185	0.00197027	0.0026393	0.00120908	0.001898	0.00105551	0.0008428	0.00253979	0.00153317	0.00185045	0.00172178	0.00100388	0.00132939	0.00048545	0.00168984
Com_Acidovorax	0.00155687	0.00109658	0.00113698	0.00210329	0.00196204	0.00121936	0.00151925	0.00166013	0.00162633	0.00171201	0.0019565	0.00144104	0.00156595	0.0022717	0.00223588	0.0018979	0.00147152	0.00115077	0.00144366	0.0009535	0.00071309
Mic_Agrococcus	0.00153712	0.00082243	0.00049078	0.00120188	0.00168175	0.000681627	0.000329477	0.000919458	0.00130106	0.00166378	0.001183	0.00235807	0.00327756	0.00134686	0.00134153	0.00156577	0.00224232	0.00204278	0.00204844	0.00197868	0.00226511
Mic_Lysinimonas	0.00153276	0.00148038	0.00053986	0.0014204	0.00332693	0.000590744	0.00038439	0.000766215	0.00078064	0.00159144	0.001456	0.00204366	0.00196654	0.00091587	0.00223588	0.00142342	0.00133138	0.00171594	0.00228255	0.00163456	0.00276846
Noc_Nocardioides	0.001528	0.00074019	0.00043353	0.00161161	0.00117296	0.000734643	0.000594889	0.000868377	0.00164801	0.0016035	0.00197925	0.00188645	0.00225788	0.00205621	0.00201229	0.00163694	0.00256933	0.00143676	0.00203868	0.00167399	0.00160445
Noc_Pimelobacter	0.0014907	0.0003701	0.00034355	0.00101067	0.000457	0.000522581	0.00101589	0.00114932	0.00065053	0.00162761	0.002002	0.00196505	0.00142028	0.00153542	0.00111794	0.00192162	0.00140145	0.00253305	0.00307266	0.0043445	0.00135277
Der_Dermatophilaceae_Group	0.0014904	0.00069907	0.00031901	0.00060094	0.00093227	0.000704348	0.000658953	0.000842837	0.00071559	0.00186874	0.0019565	0.00212226	0.00131103	0.00193948	0.0017887	0.00227748	0.00304816	0.0022062	0.00225328	0.0020217	0.00154153
Rum_Ruminococcaceae	0.00145411	0.00082243	0.00067564	0.00047893	0.00097858	0.00228497	0.00230359	0.00127192	0.0023636	0.00112968	0.00153486	0.00089345	0.00195197	0.00159468	0.00250418	0.00160847	0.00339852	0.00099688	0.00097642	0.00041366	0.00089975
Sph_Olivibacter	0.00140119	0.00098692	0.00042535	0.00143861	0.00106023	0.000484713	0.000475911	0.000408648	0.00021684	0.00197725	0.00142566	0.00167685	0.00131103	0.00057466	0	0.0009964	0.00042044	0.00299608	0.00462362	0.00232998	0.00419464
Com_Limnohabitans	0.00140064	0.00106916	0.00107972	0.00183014	0.00164519	0.00115877	0.00134536	0.00160905	0.00117096	0.0014106	0.001638	0.00133624	0.00207579	0.0018856	0.0017887	0.00092523	0.00175182	0.00098054	0.00146317	0.00096783	0.00088088
Car_Granulicatella	0.0013893	0.00090468	0.00155087	0.00181375	0.00238369	0.00118603	0.00203177	0.00154775	0.00201014	0.00063296	0.00075075	0.0014227	0.00169341	0.0014142	0.00306315	0.00168676	0.00181488	0.00050252	0.00055308	0.00041402	0.00040898
Sph_Parapedobacter	0.00136743	0.00054829	0.00044171	0.00118367	0.00077994	0.000272651	0.000311172	0.000357567	0.00013011	0.00144677	0.00112233	0.00172925	0.00211221	0.00070037	0.00044718	0.00042703	0.00035036	0.00349997	0.00454558	0.00226545	0.00467702
Pun_Puniceicoccaceae_Group	0.0013369	0.00016449	0.00014724	0.00032779	0.00127959	0.000590744	0.000494215	0.000459729	0.00052043	0.00144677	0.001001	0.00110043	0.00371457	0	0	0.00071171	0.00035036	0.00363615	0.00286781	0.00157004	0.00635488
Cel_Cellulomonas	0.00131627	0.00054829	0.00024539	0.00063736	0.00053621	0.000802806	0.000841996	0.000817296	0.0006939	0.00190491	0.00242666	0.00282968	0.00174803	0.00122115	0.00193776	0.00170811	0.00242918	0.00138909	0.00158022	0.00112555	0.00090185
Ent_Kluyvera	0.00130454	0.00176823	0.00203675	0.00286812	0.00250434	0.000795232	0.00137282	0.00137919	0.00117096	0.00075955	0.0007735	0.00094323	0.00152953	0.00070037	0.0017887	0.00113874	0.00185692	0.00061283	0.00049748	0.00127969	0.0003146
Str_Lactococcus	0.00129138	0.0008005	0.00165394	0.00158794	0.00201323	0.000902778	0.00120808	0.00173165	0.00203833	0.00069445	0.00115873	0.00121571	0.00157323	0.00114214	0.00304079	0.00152781	0.00200174	0.00041264	0.00045456	0.00032118	0.00034816
Orb_Frischella	0.00128866	0.0012172	0.00141346	0.00174819	0.00149164	0.00172679	0.00241617	0.00165502	0.00132709	0.00088253	0.0012012	0.00075458	0.00065551	0.00146539	0.00134153	0.00142342	0.00187795	0.00081711	0.00085449	0.00093773	0.00056628
Mic_Naasia	0.00126726	0.00016449	0.00024539	0.00081946	0.00065807	0.000908837	0.000439302	0.000766215	0.00143117	0.00144677	0.001456	0.00125763	0.00174803	0.00118524	0	0.00085405	0.00175182	0.00196107	0.00275076	0.00361325	0.00188759
Rhi_Agrobacterium	0.0012465	0.00068536	0.00048669	0.00101522	0.00114554	0.000287798	0.000658953	0.000702364	0.00094327	0.0016035	0.00182758	0.00153274	0.00227608	0.00091587	0.00089435	0.00153018	0.00150072	0.00157975	0.00200942	0.00140515	0.00192953
Gem_Gemella	0.00123661	0.00096636	0.00154597	0.00146138	0.0019468	0.0010338	0.00115317	0.00103439	0.0020817	0.00084998	0.00125125	0.00117903	0.00240355	0.00092933	0.00234767	0.00096081	0.00190948	0.00033706	0.00051211	0.0004194	0.00040898
Ery_RFN20	0.0012192	0.00301559	0.00263386	0.00112904	0.00106023	0.00213576	0.00113486	0.00240081	0.00151791	0.0013262	0.00103133	0.00062882	0.00043701	0.00082607	0.00119247	0.00118619	0.00053722	0.00070816	0.00046821	0.0003011	0.00071309
San_Sanguibacter	0.00117655	0.00036324	0.00042535	0.00082857	0.00066721	0.000575597	0.000379813	0.00116209	0.00053127	0.00116947	0.00119058	0.00132314	0.00205758	0.00109994	0.00175144	0.00135225	0.00144233	0.00171594	0.00194114	0.00235865	0.00119547
Lac_Anaerostipes	0.00117044	0.00074019	0.00078525	0.00136577	0.00158121	0.00156017	0.00208669	0.00153243	0.00104085	0.00103082	0.00091	0.00141484	0.00152953	0.00172398	0.00089435	0.00213513	0.00175182	0.00049027	0.00023411	0.00028677	0.0003146
Phy_Aquamicrobium	0.0011429	0.00049346	0.00053986	0.00136577	0.00173659	0.000431697	0.000439302	0.000536351	0.00058548	0.00159144	0.001456	0.00188645	0.0025128	0.00110443	0.00044718	0.00092523	0.0007708	0.00140952	0.00163875	0.00119366	0.00179321
Lac_Pseudobutyrivibrio	0.00111557	0.00101433	0.00102246	0.000346	0.00119428	0.00156017	0.00281886	0.00183892	0.00188654	0.00076558	0.0011375	0.00073362	0.00050984	0.00134237	0.0017887	0.00080661	0.00114452	0.00066731	0.00037067	0.0004194	0.00094379
Mic_Chryseoglobus	0.00108591	0.00041122	0.00014724	0.00092873	0.00025592	0.000181767	0.000439302	0.000766215	0.00065053	0.00108508	0.000728	0.00204366	0.00196654	0.00129299	0	0.00170811	0.00133138	0.00151166	0.00228255	0.00178512	0.00220219
Alc_Achromobacter	0.00107918	0.00065795	0.00044988	0.00146593	0.00112726	0.000590744	0.000768779	0.000766215	0.00043369	0.00161556	0.00175933	0.00094323	0.00101969	0.00127503	0.00044718	0.00080661	0.00067737	0.00172955	0.00216549	0.00127969	0.00160445
Ent_Serratia	0.00103087	0.00150779	0.00190236	0.00224038	0.00184191	0.000677733	0.00118716	0.00070054	0.00085499	0.0008784	0.00090133	0.00067373	0.00160444	0.00080555	0.00102212	0.00088117	0.0008382	0.00059143	0.00051002	0.00077939	0.00021872

## Sheet: Feed Sample
Supplemental Table 1. Relative abundance of Feed Sample at T0.
PHYLUM
SampleID	F0
Proteobacteria	0.353404
Firmicutes	0.063625
Actinobacteria	0.0903093
Tenericutes	0.000471274
Bacteroidetes	0.0145152
BRC1	0
Verrucomicrobia	0.00164946
Acidobacteria	0.000549819
Crenarchaeota	0.0447187
Euryarchaeota	0.0783624
Planctomycetes	0.0259201
CLASS
SampleID	F0
Actinobacteria;	0.089122
Gammaproteobacteria	0.158272
Methanobacteria	0.0668159
Bacilli	0.0619587
Clostridia	0.00146502
Epsilonproteobacteria	0.000131011
Thermoprotei;	0.0229532
Betaproteobacteria	0.0268573
Alphaproteobacteria	0.165779
Sphingobacteriia	0.00503084
Flavobacteriia	0.00495223
Unclassified	0.0161668
Bacteroidia	0.000403515
Opitutae	0.000471641
Halobacteria	0.000157214
Deltaproteobacteria	0.00248922
Mollicutes	0.000471641
AAG	0.00482123
MHVG	0.00492604
Methanomicrobia	0.000838473
Erysipelotrichi	6.73773e-05
Cytophagia	0.00403516
Acidimicrobiia	0.000471641
Thermoplasmata	0.0103761
NPL_UPA2	0
ORDER
SampleID	F0
Acidimicrobiales	0.000472765
Actinomycetales	0.0630039
Alteromonadales	0.00419448
Bacillales	0.0337679
Bacteroidales	0.000404477
Bdellovibrionales	0.000630353
Burkholderiales	0.0237223
Campylobacterales	0.000131324
Caulobacterales	0.00319116
Cerasicoccales	0
Clostridiales	0.00138972
Cytophagales	0.00404477
Desulfobacterales	0
Desulfurococcales	0.00330935
E2	0.000787941
Enterobacteriales	0.0920171
Erysipelotrichales	0.000251391
Fervidicoccales	0.0195409
Flavobacteriales	0.00496403
Frankiales	0.00136577
HA64	0
Halobacteriales	0.000157588
Lactobacillales	0.0282191
Methanobacteriales	0.066975
Methanomicrobiales	0
Micrococcales	0.0177287
Orbales	0
Pasteurellales	0.00121343
Propionibacteriales	0.00480644
Pseudomonadales	0.043953
Puniceicoccales	0.000315177
RF39	0.000157588
Rhizobiales	0.0261649
Rhodobacterales	0.00657931
Rhodocyclales	0.00170721
Rickettsiales	0.108421
Sphingobacteriales	0.00504283
Sphingomonadales	0.0190078
Thermoproteales	0
Unclassified	0.0302218
Xanthomonadales	0.0105847
FAMILY
SampleID	F0
Actinomycetaceae	0.000262699
Unclassified	0.00126095
Microbacteriaceae	0.00170754
Enterobacteriaceae	0.00297112
Lachnospiraceae	0.0259423
Campylobacteraceae	0.000157619
Comamonadaceae	0
Xanthomonadaceae	0.000394048
Sphingobacteriaceae	0.00200702
Enterococcaceae	0.000577937
Thermoproteaceae	0.000840636
Bacillaceae	0.000131349
Weeksellaceae	0.001655
Beutenbergiaceae	0.00315239
Leuconostocaceae	0.000735557
Porphyromonadaceae	0
Moraxellaceae	0.00010508
Rhodobacteraceae	0.000142733
Puniceicoccaceae	0.0114931
MSP41	0.00119265
Fervidicoccaceae	0.000420318
Cryomorphaceae	0
Corynebacteriaceae	0
Flavobacteriaceae	0.00189143
Orbaceae	0.0920352
Desulfurococcaceae	0.00631528
Pseudomonadaceae	0.00025144
Ruminococcaceae	0.0195448
Aerococcaceae	0.00240369
Micrococcaceae	0
Brucellaceae	0
Bacteriovoracaceae	0.00647552
Streptococcaceae	0.00115587
Lactobacillaceae	0.000669882
Intrasporangiaceae	0.00759501
Pyrodictiaceae	0.00702983
Hyphomicrobiaceae	0
Bacteroidaceae	0.0589496
Nocardioidaceae	0.00210947
Phyllobacteriaceae	0.00352542
Carnobacteriaceae	0.000157619
Bradyrhizobiaceae	0.00801231
Streptomycetaceae	0
Chitinophagaceae	0.0101191
Alcaligenaceae	0.00121367
Caulobacteraceae	0.00299477
Brevibacteriaceae	0
Rhizobiaceae
Helicobacteraceae	0.000262699
Erysipelotrichaceae	0.0404363
Dermatophilaceae	0.00132663
Dermacoccaceae	0.000315239
Cellulomonadaceae	0.00141857
Cerasicoccaceae	0.00554295
Methanomicrobiaceae	0.00642298
Rhodocyclaceae	0.00170754
Propionibacteriaceae	0.000294223
Tissierellaceae	0.000788096
Pseudonocardiaceae	0.00499128
Pasteurellaceae	0.00428987
Gemellaceae	0.000249564
Alteromonadaceae	0
Sanguibacteraceae	6.75511e-05
Clostridiaceae	0.370875
Promicromonosporaceae	0.00208846
Oxalobacteraceae	0.0101139
GENUS
SampleID	F0
Act_Actinomyces;	0.000213626
Act_Arcanobacterium;	0
Act_Trueperella;	0
Act_Varibaculum;	0
Aer_Facklamia;	0.000400549
Alc_Achromobacter;	0.000614176
Alt_BD2_13;	0.00024033
Alt_Cellvibrio;	0.00176242
Bac_Bacillus;	0.0252291
Bac_Bacteroides;	0
Bac_Peredibacter;	0
Beu_Beutenbergia;	0
Beu_Salana;	0.000320439
Beu_Serinibacter;	0
Bra_Bradyrhizobium;	0.00089456
Bre_Brevibacterium;	0.000587472
Bru_Ochrobactrum;	0.000587472
Cam_Arcobacter;	0
Cam_Campylobacter;	8.01099e-05
Cam_Sulfurospirillum;	0
Car_Granulicatella;	0.000280385
Cau_Brevundimonas;	0.00184253
Cel_Cellulomonas;	0.000534066
Cer_Cerasicoccus;	0
Chi_Taibaiella;	0
Com_Acidovorax;	0.00157549
Com_Comamonadaceae_Group;	0.00120165
Com_Comamonas;	0.0016022
Com_Hydrogenophaga;	0.000507362
Com_Hylemonella;	0.000133516
Com_Limnohabitans;	0.000720989
Com_Variovorax;	0.00146868
Cor_Corynebacterium;	0.00115892
Cry_Fluviicola;	0.000320439
Der_Dermacoccus;	0
Der_Dermatophilaceae_Group;	0
Des_Aeropyrum;	0.000480659
Des_Ignisphaera;	0.000961318
Ent_Citrobacter;	0.00536355
Ent_Enterobacter;	0.0273499
Ent_Enterobacteriaceae_Group;	0.0028954
Ent_Enterococcus;	0.00555428
Ent_Erwinia;	0.0107675
Ent_Escherichia_Shigella;	0.00214771
Ent_Klebsiella;	0.00691615
Ent_Kluyvera;	0.00112154
Ent_Pantoea;	0.017216
Ent_Serratia;	0.00177005
Ent_Tatumella;	0.00694285
Ent_Trabulsiella;	0.00283818
Ent_Vagococcus;	0.00081178
Ery_RFN20;	0
Fer_Fervidicoccaceae_Group;	0.0185855
Fer_Fervidicoccus;	0.00128176
Fla_Flavobacterium;	0.0016022
Fla_Myroides;	0.000280385
Gem_Gemella;	0
Hel_Sulfurovum;	0
Hyp_Devosia;	0.00574121
Int_Kribbia;	0
Lac_Blautia;	0
Lac_Coprococcus;	5.34066e-05
Lac_Dorea;	0
Lac_Lachnoclostridium;	0
Lac_Lachnospiraceae_Group;	0
Lac_Lachnospiraceae;	0.000186923
Lac_Lactobacillus;	0.0040673
Lac_Roseburia;	0
Lac_Ruminococcus;	0
Leu_Weissella;	0.00695355
Mic_Agrococcus;	0.00384527
Mic_Agromyces;	0.0016022
Mic_Arthrobacter;	0.00128977
Mic_Herbiconiux;	0.000480659
Mic_Leucobacter;	0.00272374
Mic_Lysinimonas;	0.00544747
Mic_Microbacterium;	0.00849165
Mic_Naasia;	0
Mic_Pseudoclavibacter;	0.00544747
Mic_Rothia;	0.000320439
Mor_Acinetobacter;	0.00327916
MSP_MSP41_Group;	0.00016022
Noc_Nocardioides;	0.00608835
Noc_Pimelobacter;	0
Opi_Opitutus;	0
Orb_Frischella;	0
Orb_Gilliamella;	0
Orb_Orbaceae_Group;	0
Phy_Aquamicrobium;	0.000400549
Por_Dysgonomonas;	0
Pse_Pseudomonas;	0.0404225
Pun_Cerasicoccus;	0
Pun_Coraliomargarita;	0
Pun_Puniceicoccaceae_Group;	0
Pyr_Pyrodictiaceae_Group;	0.000961318
Rhi_Agrobacterium;	0.00376516
Rho_Paracoccus;	0.000787747
Rho_Rhodobacter;	0.00200275
Rho_Rhodobacteraceae_Group;	0.00104143
Rum_Ruminococcaceae;	0.000173571
Rum_Ruminococcus;	0
San_Sanguibacter;	0.000801099
Sph_Olivibacter;	0
Sph_Parapedobacter;	0
Sph_Sphingobacteriaceae_Group;	0.00016022
Sph_Sphingobacterium;	0.00347143
Str_Lactococcus;	0.00308156
Str_Streptococcus;	0.00109216
Str_Streptomyces;	0.00016022
Str_Streptophyta_Group;	0.0471847
The_Pyrobaculum;	0
Tis_Sedimentibacter;	0
Unclassified	0.376994
Wee_Wautersiella;	0.000480659
Xan_Luteimonas;	0.0024033
Xan_Lysobacter;	0.00112154
Xan_Pseudoxanthomonas;	0.00024033
Xan_Stenotrophomonas;	0.00427253
Xan_Thermomonas;	0
